# Supplementary material
Source: publisher figshare collection journal article supplement (https://frontiersin.figshare.com/ndownloader/files/18656276)
Supplement: Supplementary file [file 18656276]

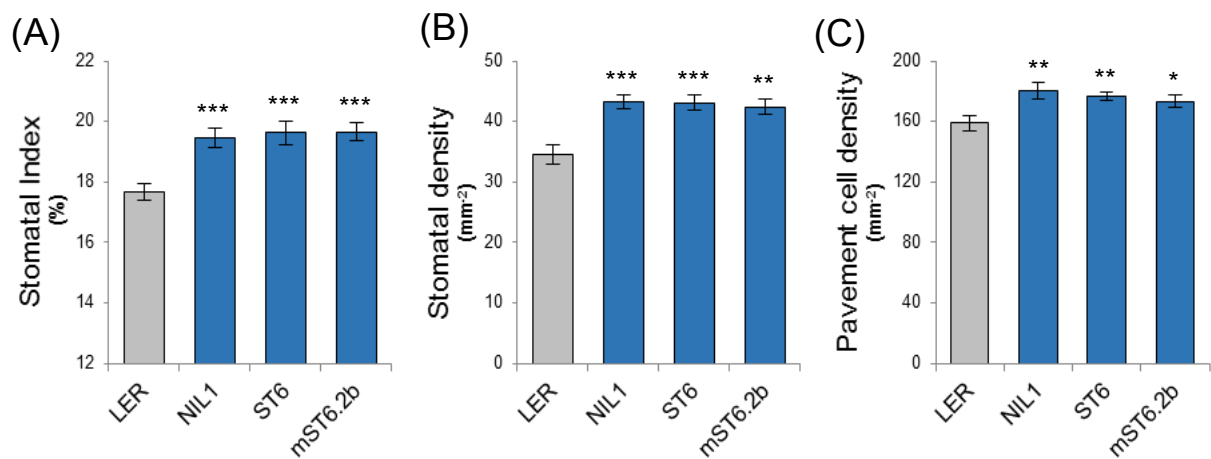

**Supplementary Figure S4.** Trait values of *MID3-L1-0* lines grown in greenhouse. Stomatal index (A), stomatal density (B) and pavement cell density (C) were scored at 21 dag in the adaxial cotyledons of NIL1, ST6, mST6.2b and LER plants growth in greenhouse. Each panel shows the mean±SE of 10 plants. Significant differences with respect to the reference strain LER are indicated by asterisks (\*\*\* $P \leq 0.001$ ; \*\* $P \leq 0.01$ ; \*  $P \leq 0.05$ ; Student's *t*-test). Note that in greenhouse conditions the *MID3-L1-0* allele increased SI, SD and also PD.
